# Supplementary material
Source: Springer Nature journal article supplement (https://www.springermedizin.de/resource/supplementary/12913_2013_3138_MOESM2_ESM.pdf/9532476)

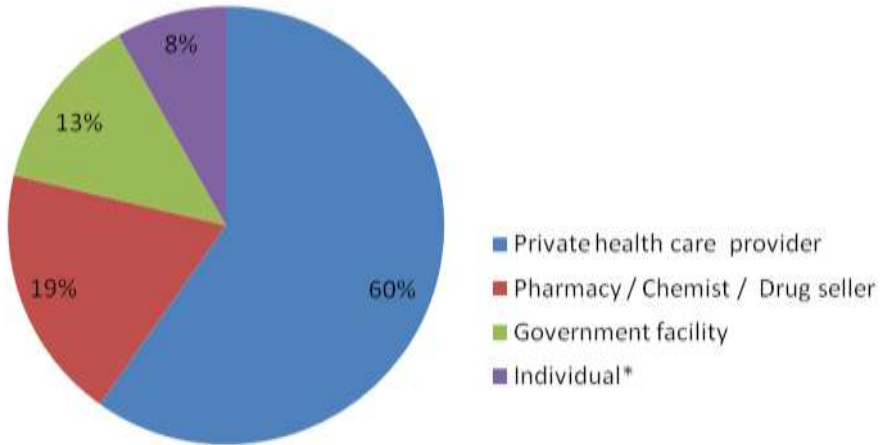

\* individual meaning relative, health volunteer, traditional healers, religious leader etc

Supplement: MOESM2 [file 9532476]
